# Supplementary material
Source: publisher figshare collection journal article supplement (https://sage.figshare.com/ndownloader/files/17302226)
Supplement: Supplementary file 1 [file 17302226]

## Appendix A

### *Pre-October 2016 original PCP close-out survey*

Q1. Which of the following best describes the outcome of this eConsult for your patient:

1. I was able to confirm a course of action that I originally had in mind
2. I got good advice for a new or additional course of action
3. I did not find the response very useful
4. None of the above (please comment)

Q2. As a result of this eConsult, would you say that:

1. Referral was originally contemplated but now avoided at this stage
2. Referral was originally contemplated and is still needed - this eConsult likely leads to a more effective visit
3. Referral was not originally contemplated and is still not needed - this eConsult provided useful feedback/information
4. Referral was not originally contemplated, but eConsult process resulted in a referral being initiated
5. There was no particular benefit to using eConsult in this case
6. Other (please comment)

Q3. Please rate the overall value of the eConsult service in this case for your patient:

Minimal 1 2 3 4 5 Excellent

Q4. Please rate the overall value of the eConsult service in this case for you as a primary care provider:

Minimal 1 2 3 4 5 Excellent

Q5. We would value any additional feedback you provide:
